# Supplementary material
Source: HighWire-hosted journal article supplement (https://srh.bmj.com/content/47/3/e4)
Supplement: inline-supplementary-material-1 [file inline-supplementary-material-1.pdf]

**Supplementary Table 1. Sexual practices engagement with the most recent casual partner among men who have sex with men, stratified by age.**

| Sexual practices                 | Age group     |               |               |             | Total (N=1524) |
|----------------------------------|---------------|---------------|---------------|-------------|----------------|
|                                  | 16-25 (N=415) | 26-35 (N=662) | 36-45 (N=236) | ≥46 (N=211) |                |
| Kissing each other               | 395 (95%)     | 623 (94%)     | 216 (92%)     | 174 (82%)   | 1408 (92%)     |
| Touching penises                 | 331 (80%)     | 544 (82%)     | 193 (82%)     | 159 (75%)   | 1227 (81%)     |
| Mutual masturbation using saliva | 222 (53%)     | 377 (57%)     | 124 (53%)     | 100 (47%)   | 823 (54%)      |
| Insertive rimming                | 135 (35%)     | 270 (41%)     | 94 (40%)      | 81 (38%)    | 580 (38%)      |
| Receptive rimming                | 200 (48%)     | 320 (48%)     | 99 (42%)      | 79 (37%)    | 698 (46%)      |
| Receiving penile-oral sex        | 344 (83%)     | 576 (87%)     | 210 (89%)     | 181 (86%)   | 1311 (86%)     |
| Performing penile-oral sex       | 354 (85%)     | 557 (84%)     | 196 (83%)     | 171 (81%)   | 1278 (84%)     |
| Insertive penile-anal sex        | 180 (43%)     | 339 (51%)     | 134 (57%)     | 114 (54%)   | 767 (50%)      |
| Receptive penile-anal sex        | 219 (53%)     | 322 (49%)     | 98 (42%)      | 83 (39%)    | 722 (47%)      |
