# Supplementary material
Source: HighWire-hosted journal article supplement (https://srh.bmj.com/content/47/3/e4)
Supplement: inline-supplementary-material-2 [file inline-supplementary-material-2.pdf]

**Supplementary Table 2. Sexual practices engagement with the most recent regular partner among men who have sex with men, stratified by age.**

| Sexual practices                 | Age group     |               |              |            | Total (N=588) |
|----------------------------------|---------------|---------------|--------------|------------|---------------|
|                                  | 16-25 (N=148) | 26-35 (N=256) | 36-45 (N=93) | ≥46 (N=91) |               |
| Kissing each other               | 141 (95%)     | 573 (97%)     | 91 (98%)     | 87 (96%)   | 573 (97%)     |
| Touching penises                 | 133 (90%)     | 529 (90%)     | 80 (86%)     | 82 (90%)   | 529 (90%)     |
| Mutual masturbation using saliva | 90 (61%)      | 347 (59%)     | 51 (55%)     | 44 (48%)   | 347 (59%)     |
| Insertive rimming                | 62 (42%)      | 264 (45%)     | 43 (46%)     | 43 (47%)   | 264 (45%)     |
| Receptive rimming                | 81 (55%)      | 287 (49%)     | 38 (41%)     | 42 (46%)   | 287 (49%)     |
| Receiving penile-oral sex        | 128 (86%)     | 519 (88%)     | 85 (91%)     | 77 (85%)   | 519 (88%)     |
| Performing penile-oral sex       | 133 (90%)     | 518 (88%)     | 77 (83%)     | 78 (86%)   | 518 (88%)     |
| Insertive penile-anal sex        | 86 (58%)      | 358 (61%)     | 65 (70%)     | 54 (59%)   | 358 (61%)     |
| Receptive penile-anal sex        | 106 (72%)     | 343 (58%)     | 44 (47%)     | 53 (58%)   | 343 (58%)     |
